# Supplementary material for: Availability and readiness to provide sexually transmitted infections and HIV testing and counselling services in Nepal: evidence from comprehensive health facility survey
Source: HighWire-hosted journal article supplement (doi:10.1136/bmjopen-2020-040918), 2020-12-01
Supplement: bmjopen-2020-040918supp001_data_supplement.pdf [file bmjopen-2020-040918supp001_data_supplement.pdf]

## Availability and readiness to provide sexually transmitted infections and HIV testing and counselling services in Nepal: evidence from comprehensive health facility survey

Supplementary table 1 Description of each domain of the STI and HTC services

| Domain                           | Indicators                                                                       | Questions Asked                                                                                                                                                                                                                                                                                                                                                                                                                                                                                                                                                                                                                                      |
|----------------------------------|----------------------------------------------------------------------------------|------------------------------------------------------------------------------------------------------------------------------------------------------------------------------------------------------------------------------------------------------------------------------------------------------------------------------------------------------------------------------------------------------------------------------------------------------------------------------------------------------------------------------------------------------------------------------------------------------------------------------------------------------|
| <b>STI Service</b>               |                                                                                  |                                                                                                                                                                                                                                                                                                                                                                                                                                                                                                                                                                                                                                                      |
| <b>Staff and guidelines</b>      | Guidelines for diagnosis and treatment of STIs                                   | Do you have the national guidelines on case management of sexually transmitted infections available in this service area? If YES, may I see the national guidelines? (Observed/Not observed)<br><br>-Observed is considered for the analysis                                                                                                                                                                                                                                                                                                                                                                                                         |
|                                  | Staff trained in STI diagnosis and treatment                                     | In your current position, and as part of your work for this facility, do you personally provide any STI services? If YES: Have you received any in-service training, training updates or refresher training on topics related to STI services? If YES, have you received any in-service training, training updates or refresher training in Diagnosing and treating sexually transmitted infections (STIs)? IF YES: Was the training, training update or refresher training within the past 24 months or more than 24 months ago?<br><br>- At least one staff member providing the service trained in in last 24 months is considered for the study. |
| <b>Diagnostics</b>               | Syphilis rapid test                                                              | Do you use syphilis rapid diagnostic test to diagnose syphilis at this service site? If YES, May I see a sample syphilis rapid diagnostic test (RDT) kit? (observed, at least 1 valid/ Observed not valid/ Reported available, not seen / None available today).<br><br>Observed, at least 1 valid expiration date is considered for the analysis                                                                                                                                                                                                                                                                                                    |
| <b>Medicines and commodities</b> | Condoms                                                                          | Is Condoms available in the facility/ service area today? (observed, at least 1 valid/ Observed not valid/ Reported available, not seen / None available today).<br><br>Observed, at least 1 valid expiration date is considered for the analysis                                                                                                                                                                                                                                                                                                                                                                                                    |
|                                  | Metronidazole cap/tab                                                            | Is Metronidazole cap/tab available in the facility/ location today? (observed, at least 1 valid/ Observed not valid/ Reported available, not seen / None available today).<br><br>Observed, at least 1 valid expiration date is considered for the analysis                                                                                                                                                                                                                                                                                                                                                                                          |
|                                  | Ciprofloxacin cap/tab (not found in 2015 NHFS), cefixime cap/tab is used instead | Is Cefixime cap/tab available in the facility/ location today? (observed, at least 1 valid/ Observed not valid/ Reported available, not seen / None available today).<br><br>Observed, at least 1 valid expiration date is considered for the analysis                                                                                                                                                                                                                                                                                                                                                                                               |
|                                  | Ceftriaxone injection                                                            | Is Cefixime cap/tab available in the facility/ location today? (observed, at least 1 valid/ Observed not valid/ Reported available, not seen / None available today).<br><br>Observed, at least 1 valid expiration date is considered for the analysis                                                                                                                                                                                                                                                                                                                                                                                               |
|                                  |                                                                                  |                                                                                                                                                                                                                                                                                                                                                                                                                                                                                                                                                                                                                                                      |
| <b>STI Service</b>               |                                                                                  |                                                                                                                                                                                                                                                                                                                                                                                                                                                                                                                                                                                                                                                      |
| <b>Staff and guidelines</b>      | Guidelines for HIV counselling and testing                                       | Do you have the national HIV testing and counseling guidelines available in this service area? If YES, may I see the guidelines? (Observed/Not observed)<br><br>-Observed is considered for the analysis                                                                                                                                                                                                                                                                                                                                                                                                                                             |
|                                  | Staff trained in HIV counselling and testing                                     | In your current position, and as part of your work for this facility, do you personally provide any HTC services? If YES: Have you received any in-service training, training updates or refresher training on topics related to HTC services? If YES, have you received any in-service training, training updates or refresher training in HIV testing and counselling? IF YES: Was the training, training update or refresher training within the past 24 months or more than 24 months ago?<br><br>- At least one staff member providing the service trained in in last 24 months is considered for the study.                                    |
| <b>Equipment</b>                 | Visual and auditory privacy                                                      | Describe the setting if the room or area (Enumerators should assess the room) Whether its                                                                                                                                                                                                                                                                                                                                                                                                                                                                                                                                                            |

|                                  |                         |                                                                                                                                                                                                                                                                                                                                                                                                                                                                                                             |
|----------------------------------|-------------------------|-------------------------------------------------------------------------------------------------------------------------------------------------------------------------------------------------------------------------------------------------------------------------------------------------------------------------------------------------------------------------------------------------------------------------------------------------------------------------------------------------------------|
|                                  |                         | Private room/Other room with auditory and visual privacy/Visual privacy only/ No privacy)<br>-Room with visual and auditory privacy is considered for the analysis                                                                                                                                                                                                                                                                                                                                          |
| <b>Diagnostics</b>               | HIV diagnostic capacity | Whether the facilities conducting HIV testing at the facility had at least one unexpired Determine, at least one unexpired Uni-Gold, and at least one unexpired Stat Pak HIV rapid diagnostic test kit available somewhere in the facility on the day of the survey, or else facility had ELISA testing capacity or other HIV testing capacity observed in the facility on the day of the survey.<br><br>-Observed at least one valid expiration of all the mentioned tests are considered for the analysis |
| <b>Medicines and commodities</b> | Condoms                 | Is Condoms available in the facility/ service area today? (observed, at least 1 valid/ Observed not valid/ Reported available, not seen / None available today).<br><br>Observed, at least 1 valid expiration date is considered for the analysis                                                                                                                                                                                                                                                           |
