# Supplementary material for: Availability and readiness to provide sexually transmitted infections and HIV testing and counselling services in Nepal: evidence from comprehensive health facility survey
Source: HighWire-hosted journal article supplement (doi:10.1136/bmjopen-2020-040918), 2020-12-01
Supplement: bmjopen-2020-040918supp002_data_supplement.pdf [file bmjopen-2020-040918supp002_data_supplement.pdf]

Supplementary table 2 Summary of measurement procedure of STI and HTC readiness score

| Domain                                 | indicators                                     | Measurement | Percent score (%) |        |
|----------------------------------------|------------------------------------------------|-------------|-------------------|--------|
|                                        |                                                |             | Indicator         | Domain |
| <b>STI service readiness index</b>     |                                                |             |                   |        |
| Staff and guidelines                   | Guidelines for diagnosis and treatment of STIs | Yes         | 16.66             | 33.33  |
|                                        |                                                | No          | 0.00              |        |
|                                        | At least one staff trained in STI              | Yes         | 16.66             |        |
|                                        |                                                | No          | 0.00              |        |
| Diagnostics                            | Syphilis rapid test                            | Yes         | 33.33             | 33.33  |
|                                        |                                                | No          | 0.00              |        |
| Medicines and commodities              | Condoms                                        | Yes         | 8.33              | 33.33  |
|                                        |                                                | No          | 0.00              |        |
|                                        | Metronidazole cap/tab                          | Yes         | 8.33              |        |
|                                        |                                                | No          | 0.00              |        |
|                                        | Cefixime                                       | Yes         | 8.33              |        |
|                                        |                                                | No          | 0.00              |        |
|                                        | Ceftriaxone                                    | Yes         | 8.33              |        |
|                                        |                                                | No          | 0.00              |        |
| <b>Total STI readiness index score</b> |                                                |             |                   | 100.00 |
| <b>HTC service readiness index</b>     |                                                |             |                   |        |
| Staff and guidelines                   | Guidelines for HTC                             | Yes         | 12.50             | 25.00  |
|                                        |                                                | No          | 0.00              |        |
|                                        | At least one staff trained in HTC              | Yes         | 12.50             |        |
|                                        |                                                | No          | 0.00              |        |
| Equipment                              | Visual and auditory privacy                    | Yes         | 25.00             | 25.00  |
|                                        |                                                | No          | 0.00              |        |
| Diagnostics                            | HIV diagnostic capacity                        | Yes         | 25.00             | 25.00  |
|                                        |                                                | No          | 0.00              |        |
| Supplies and commodities               | condoms                                        | Yes         | 25.00             | 25.00  |

|                                 |  |    |      |        |
|---------------------------------|--|----|------|--------|
|                                 |  | No | 0.00 |        |
| Total HTC readiness index score |  |    |      | 100.00 |
